# Supplementary material for: Influences of Host Community Characteristics on Borrelia burgdorferi Infection Prevalence in Blacklegged Ticks
Source: PubMed Central journal article supplement (PMC5241014; doi:10.1371/journal.pone.0167810), 2017-01-17
Supplement: pone.0167810.s003.pdf [file pone.0167810.s003.pdf]

### S3 Table. Example of a Site-Specific Partition of the Full Dataset for the Bayesian Analyses

Data from all 14 tested ticks sampled from site 602 ( $i=2$ ) in 2006 are presented below.

Rows are sorted according to the observed presence/absence of infection ( $z_{ij}$ ), observed success/failure of RLB test ( $v_{ij}$ ) if  $z_{ij} = 1$  (otherwise "NA" for "not applicable"), and observed presence/absence of HIS strains ( $t_{ij}$ ) if  $z_{ij} = v_{ij} = 1$  (otherwise missing data). Boldfaced entries are determined automatically by the value(s) in the preceding column(s).

| $i$ (Site Label) | Tick Label $j$ (sorted) | $z_{ij}$ | $v_{ij}$  | $t_{ij}$       |
|------------------|-------------------------|----------|-----------|----------------|
| 2 (602)          | 1                       | 0        | <b>NA</b> | <b>0</b>       |
|                  | 2                       | 0        | <b>NA</b> | <b>0</b>       |
|                  | 3                       | 0        | <b>NA</b> | <b>0</b>       |
|                  | 4                       | 0        | <b>NA</b> | <b>0</b>       |
|                  | 5                       | 0        | <b>NA</b> | <b>0</b>       |
|                  | 6                       | 0        | <b>NA</b> | <b>0</b>       |
|                  | 7                       | 0        | <b>NA</b> | <b>0</b>       |
|                  | 8                       | 0        | <b>NA</b> | <b>0</b>       |
|                  | 9                       | 1        | 0         | <b>missing</b> |
|                  | 10                      | 1        | 0         | <b>missing</b> |
|                  | 11                      | 1        | 0         | <b>missing</b> |
|                  | 12                      | 1        | 0         | <b>missing</b> |
|                  | 13                      | 1        | 1         | 0              |
|                  | 14                      | 1        | 1         | 1              |
